# Supplementary material
Source: Springer Nature journal article supplement (https://www.springermedizin.de/resource/supplementary/12874_2010_510_MOESM1_ESM.pdf/9432028)
Supplement: MOESM1 [file 9432028]

**1** $Y$  $X_1, X_2, \dots, X_{20}$ **2** $X_1 \rightarrow Y$  $X_2, X_3, \dots, X_{20}$ **3** $X_1 \rightarrow Y$   
 $X_2 \nearrow$  $X_3, X_4, \dots, X_{20}$ **4** $X_1 \rightarrow Y$   
 $\downarrow$   
 $X_2$  $X_3, X_4, \dots, X_{20}$ **5** $X_1 \rightarrow Y$   
 $\uparrow$   
 $X_2$  $X_3, X_4, \dots, X_{20}$
